# Supplementary material
Source: PubMed Central journal article supplement (PMC8982594)
Supplement: EMBR-23-e54932-s001.pdf [file EMBR-23-e54932-s001.pdf]

# The return of the seasonal flu and cold

Philip Hunter

DOI: 10.15252/embr.202254932

Corresponding author(s): Philip Hunter ([ph@philiphunter.com](mailto:ph@philiphunter.com))

---

## Review Timeline:

Submission Date:

24th Feb 22

Accepted:

24th Feb 22

---

Editor: Holger Breithaupt

## Transaction Report:

(Note: With the exception of the correction of typographical or spelling errors that could be a source of ambiguity, letters and reports are not edited. Depending on transfer agreements, referee reports obtained elsewhere may or may not be included in this compilation. Referee reports are anonymous unless the Referee chooses to sign their reports.)

Mr. Philip Hunter  
freelance  
freelance  
44, Brodrick Road  
London SW17 7DY  
United Kingdom

Dear Mr. Hunter,

I am pleased to accept your Science & Society article for publication in the next available issue of EMBO reports.

It has been a pleasure to work with you on this article. Thank you for contributing to EMBO reports.

Sincerely,

Holger Breithaupt, PhD  
Senior Editor, Science & Society  
EMBO reports

\*\*\*\*\*

Should you be planning a Press Release on your article, please get in contact with [emboreports@wiley.com](mailto:emboreports@wiley.com) as early as possible, in order to coordinate publication and release dates.



Mr. Philip Hunter  
freelance  
freelance  
44, Brodrick Road  
London SW17 7DY  
United Kingdom

Dear Mr. Hunter,

I am pleased to accept your Science & Society article for publication in the next available issue of EMBO reports.

It has been a pleasure to work with you on this article. Thank you for contributing to EMBO reports.

Sincerely,

Holger Breithaupt, PhD  
Senior Editor, Science & Society  
EMBO reports

\*\*\*\*\*

Should you be planning a Press Release on your article, please get in contact with [emboreports@wiley.com](mailto:emboreports@wiley.com) as early as possible, in order to coordinate publication and release dates.
